# Supplementary material
Source: PubMed Central journal article supplement (PMC9482947)
Supplement: NIHMS1832527-supplement-4.pdf [file NIHMS1832527-supplement-4.pdf]

**UW Medicine**

**UW SCHOOL  
OF MEDICINE**

**DIVISION OF ALLERGY &  
INFECTIOUS DISEASES**

**Rena Patel, MD, MPH, MPhil**  
Assistant Professor

June 10, 2022

Dr. Jane Godsland  
*The Lancet Child & Adolescent Health*

**RE: Original research re-submission for “Opt4Kids” study, THELANCETCHILDADOL-D-22-00251**

Dear Dr. Godsland,

We are most grateful to be able to address the editorial requests and resubmit our original research manuscript titled “Impact of point-of-care HIV viral load and targeted drug resistance mutation testing on viral suppression among Kenyan children on antiretroviral therapy: Results from an open-label, randomized controlled trial (Opt4Kids)” for consideration in your journal.

The accompanying “Editorial points” document indicates each requested change with our responses noted in capital letters. Versions of the manuscript, figures/tables, and supplementary materials files with track changes are submitted as well as versions without track changes. All other requested documentation is either already or now submitted.

We look forward to your positive response, and please do not hesitate to contact us with any questions or concerns.

Sincerely,



Rena Patel, MD, MPH, MPhil

**Division of Allergy and Infectious Diseases**

750 Republican Street Box 358061 Seattle, WA 98109 Office phone: 206.520.3811 rcpatel@uw.edu
